# Supplementary material for: Contributions of primary sources to submicron organic aerosols in Delhi, India
Source: Copernicus journal article supplement (doi:10.5194/acp-22-13631-2022), 2022-10-21
Supplement: Supplementary file 1 [file acp-22-13631-2022-supplement.zip]

Archive with 4 entries (4 files):
- Contributions_Supplement_2022_submission_2b.pdf
- SupplementaryFile-FigS8.pdf
- SupplementaryFile-FigS9.pdf
- acp-22-13631-2022-supplement-title-page.pdf
