# Supplementary material for: Contributions of primary sources to submicron organic aerosols in Delhi, India
Source: Copernicus journal article supplement (doi:10.5194/acp-22-13631-2022), 2022-10-21
Supplement: Supplementary file 1 [file acp-22-13631-2022-supplement.zip › acp-22-13631-2022-supplement-title-page.pdf]

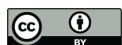

*Supplement of*

## **Contributions of primary sources to submicron organic aerosols in Delhi, India**

**Sahil Bhandari et al.**

*Correspondence to:* Lea Hildebrandt Ruiz (lhr@che.utexas.edu) and Joshua S. Apte (apte@berkeley.edu)

- [acp-22-13631-2022-supplement-title-page.pdf](#)
- [Contributions\\_Supplement\\_2022\\_submission\\_2b.pdf](#)
- [SupplementaryFile-FigS8.pdf](#)
- [SupplementaryFile-FigS9.pdf](#)

The copyright of individual parts of the supplement might differ from the article licence.
